# Supplementary material for: Gut Microbiota-Derived Short Chain Fatty Acids Induce Circadian Clock Entrainment in Mouse Peripheral Tissue
Source: PubMed Central journal article supplement (PMC5780501; doi:10.1038/s41598-018-19836-7), 2018-01-23
Supplement: 41598_2018_19836_MOESM1_ESM.pdf [file 41598_2018_19836_MOESM1_ESM.pdf]

1 **Supplemental information**

2

3 **Gut Microbiota-Derived Short Chain Fatty Acids Induce Circadian Clock Entrainment in**

4 **Mouse Peripheral Tissue**

5

6 Yu Tahara<sup>\*, 1, 2</sup>, Mayu Yamazaki<sup>\*, 1</sup>, Haruna Sukigara<sup>1</sup>, Hiroaki Motohashi<sup>1</sup>, Hiroyuki Sasaki<sup>1</sup>, Hiroki

7 Miyakawa<sup>1</sup>, Atsushi Haraguchi<sup>1</sup>, Yuko Ikeda<sup>1</sup>, Shinji Fukuda<sup>3, 4</sup>, and Shigenobu Shibata<sup>1, †</sup>

8

9 <sup>1</sup>Laboratory of Physiology and Pharmacology, School of Advanced Science and Engineering,

10 Waseda University, Tokyo, Japan

11 <sup>2</sup>Waseda Institute for Advanced Study, Waseda University, Tokyo, Japan

12 <sup>3</sup>Institute for Advance Biosciences, Keio University, 246-2 Mizukami, Kakuganji, Tsuruoka

13 997-0052, Japan

14 <sup>4</sup>PRESTO, Japan Science and Technology Agency, 4-1-8 Honcho, Kawaguchi, Saitama 332-0012,

15 Japan

16

17

18

**A** Under antibiotics treatment

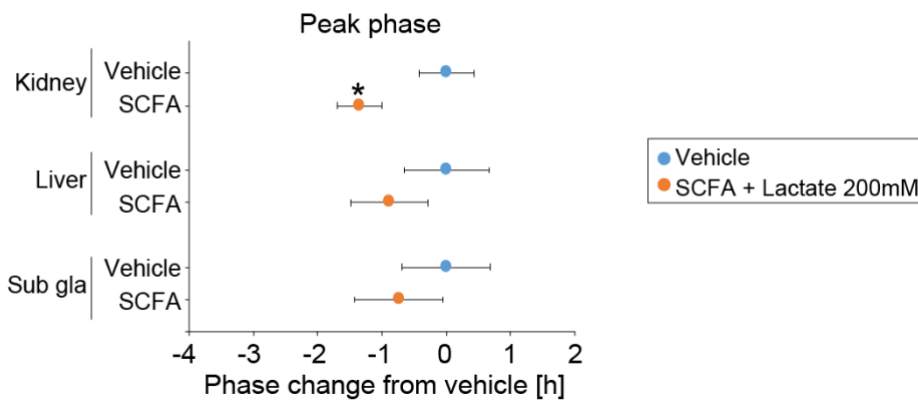

**B** Under no antibiotics treatment

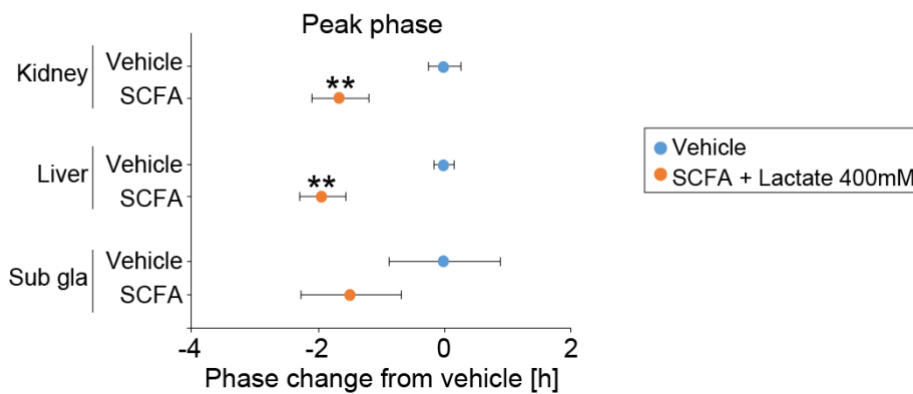

19

20 Figure S1. Administration of short chain fatty acids (SCFA) and organic acid (lactate) changed the  
 21 phase of peripheral PER2::LUC rhythms (related to Figure 3). (A) Peak phase changes of  
 22 PER2::LUC rhythms in the peripheral tissues. Mice were treated by vehicle or low dose of SCFA +  
 23 lactate mix (200 mM) with a same schedule of Figure 3A. (B) Peak phase changes of PER2::LUC  
 24 rhythms in the peripheral tissues. Mice were not treated with antibiotics. Mice were treated by  
 25 vehicle or SCFA + lactate mix (400 mM) with a same schedule of Figure 3A. The value of peak  
 26 change of the vehicle-injected group was set as 0. All the values are expressed as mean ± SEM. The  
 27 number of mice used in this study is indicated in Table S1. More details on the statistics is presented  
 28 in Table S2. \*p < 0.05, \*\*p < 0.01, vs. vehicle injected group (Mann Whitney test).

29

30

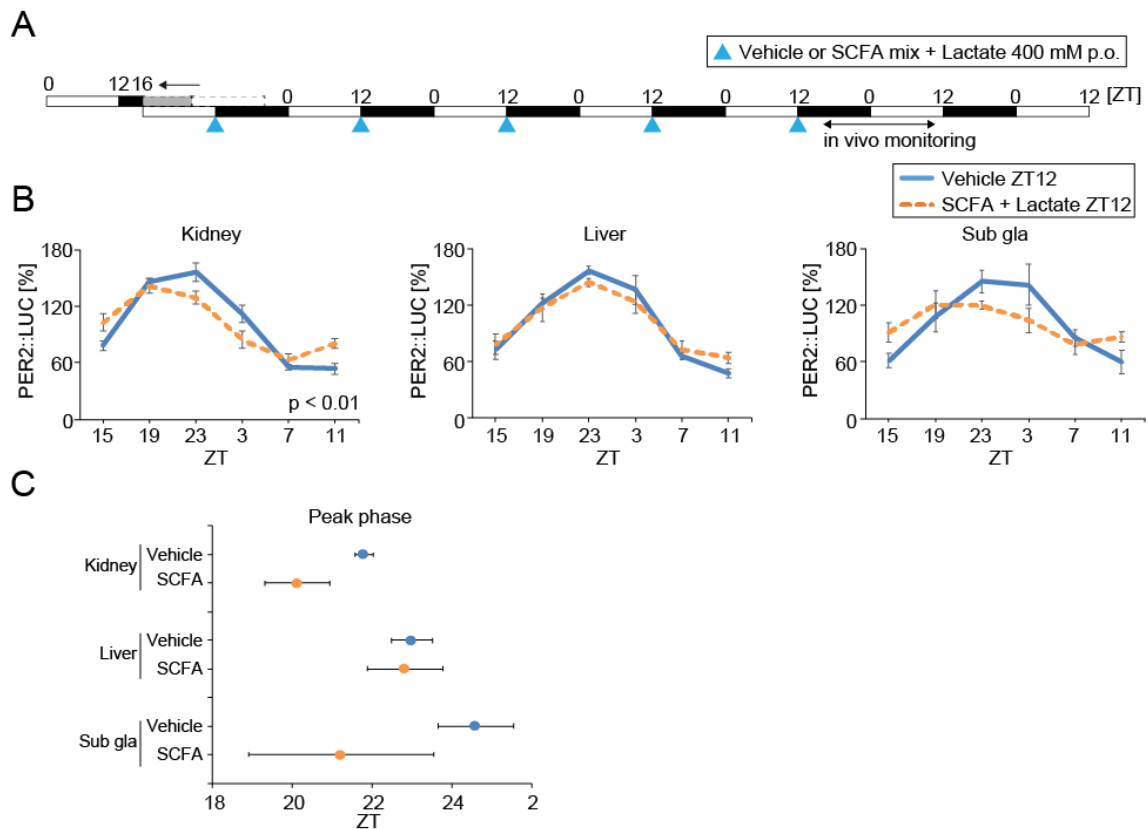

31

32 Figure S2. Administration of short chain fatty acids (SCFA) accelerated phase entrainment of  
 33 peripheral PER2::LUC rhythms to 8-hour shifted new light-dark cycle. (A) Experimental schedule.  
 34 12 hour light-dark cycle was phase-advanced for 8 hours. Vehicle or SCFA + lactate was  
 35 administered to mice at ZT12 for consecutive 5 days, then peripheral PER2::LUC rhythms were  
 36 measured from ZT23. (B, C) Waveform (B) and peak phase (C) of PER2::LUC rhythms. All values  
 37 are expressed as mean  $\pm$  SEM. The number of mice used in this study is indicated in Table S1. More  
 38 detail on the statistics is included in Table S2. P value of the two-way ANOVA is indicated in the  
 39 lower right side of each graph if significant.

40

41

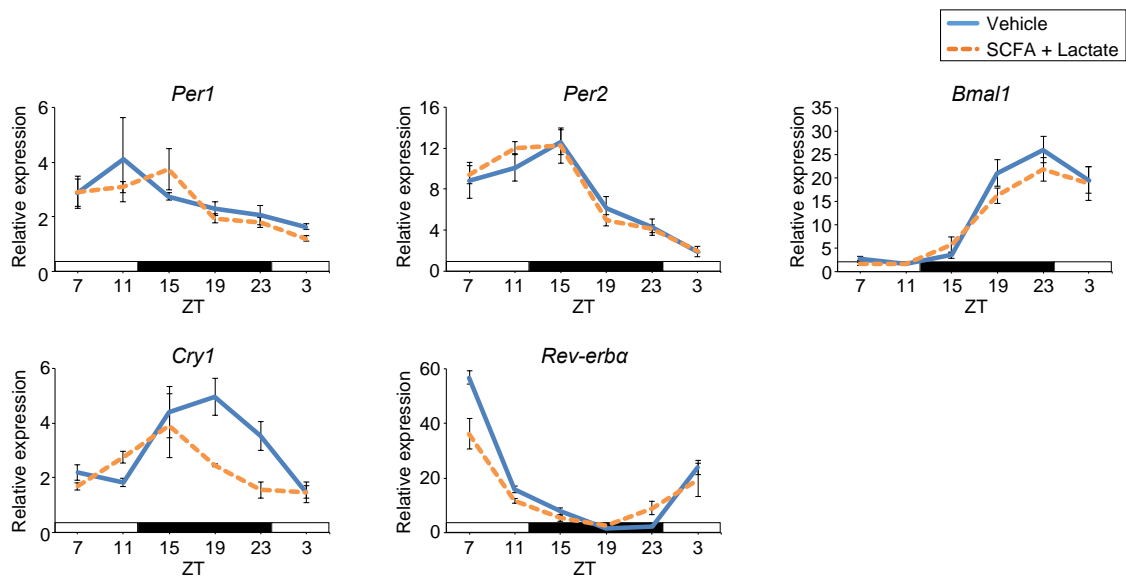

42

43 Figure S3. Administration of short chain fatty acids (SCFA) changed the phase of clock gene  
 44 expression rhythms in the submandibular gland of antibiotic-induced microbiota depleted mice  
 45 (related to Figure 4). (A) Similar to Fig. 1A, antibiotic-induced microbiota depleted mice were orally  
 46 gavaged SCFA + lactate mix (400 mM in each) at ZT5 for three consecutive days; then,  
 47 submandibular glands were collected every 4 hours for 24 hours starting at ZT7 after the last  
 48 injection. (B) Clock gene expression measured by RT-PCR. Peak phase analysis is shown in Table  
 49 S3. Gene expression levels were normalized to *Gapdh*. All the values are expressed as mean  $\pm$  SEM.

50

51

52

**A** SCFA or Lactate 100 $\mu$ M at CT1 in MEFs

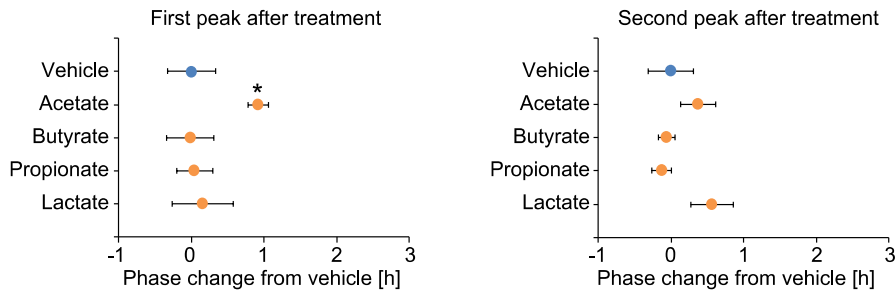

**B** SCFA or Lactate 100 $\mu$ M at CT8 in MEFs

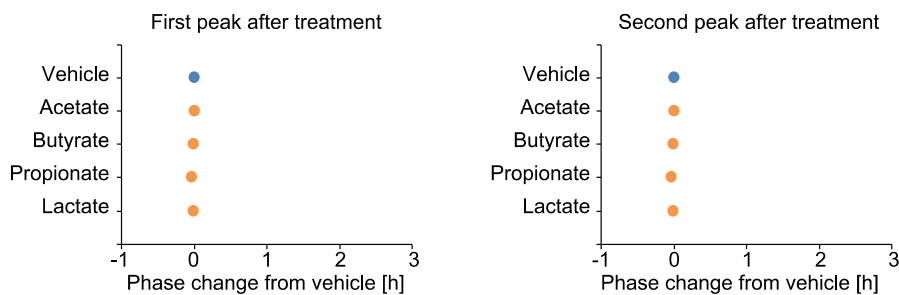

53

54 Figure S4. Administration of each short chain fatty acids (SCFA) or lactate in PER2::LUC mouse  
 55 embryonic fibroblasts (related to Figure 6). Phase changes of the first or second peak after SCFA or  
 56 lactate (100  $\mu$ M) treatment at CT1 (A) or CT8 (B). Value of peak change of the vehicle treatment  
 57 was set as 0. All the values are expressed as mean  $\pm$  SEM (n = 4 in each group). \*p < 0.05 vs.  
 58 vehicle only treatment (t-test).

59

60

61

62

63

64 Table S1. Numbers of mice examined and tissues that met the rhythmicity criteria in each

65 experimental group.

| group name                | number of mice | number of tissue samples showing rhythmic (rhythmic/total) |       |         | Figure No. |
|---------------------------|----------------|------------------------------------------------------------|-------|---------|------------|
|                           |                | kidney                                                     | liver | sub gla |            |
| Vehicle                   | 6              | 6/6                                                        | 6/6   | 6/6     | 2          |
| Antibiotics               | 8              | 8/8                                                        | 8/8   | 8/8     | 2          |
| Vehicle ZT0               | 3              | 3/3                                                        | 3/3   | 3/3     | 3          |
| SCFA ZT0                  | 4              | 4/4                                                        | 4/4   | 4/4     | 3          |
| Vehicle ZT5               | 8              | 8/8                                                        | 8/8   | 8/8     | 3, 5, S1   |
| SCFA ZT5                  | 9              | 7/9                                                        | 9/9   | 9/9     | 3          |
| Vehicle ZT12              | 3              | 3/3                                                        | 3/3   | 3/3     | 3          |
| SCFA ZT12                 | 3              | 3/3                                                        | 3/3   | 3/3     | 3          |
| Vehicle ZT17              | 6              | 6/6                                                        | 6/6   | 6/6     | 3          |
| SCFA ZT17                 | 5              | 5/5                                                        | 5/5   | 5/5     | 3          |
| Acetate 400 mM            | 5              | 5/5                                                        | 5/5   | 2/5     | 5          |
| Acetate 1600 mM           | 5              | 5/5                                                        | 5/5   | 4/5     | 5          |
| Butyrate 400 mM           | 4              | 4/4                                                        | 3/4   | 4/4     | 5          |
| Butyrate 1600 mM          | 5              | 5/5                                                        | 5/5   | 5/5     | 5          |
| Propionate 400 mM         | 5              | 5/5                                                        | 5/5   | 5/5     | 5          |
| Propionate 1600 mM        | 5              | 5/5                                                        | 5/5   | 5/5     | 5          |
| Lactate 400 mM            | 5              | 4/5                                                        | 4/5   | 5/5     | 5          |
| Lactate 1600 mM           | 7              | 6/7                                                        | 7/7   | 7/7     | 5          |
| Control                   | 6              | 5/6                                                        | 5/6   | 6/6     | 7          |
| Fasting                   | 5              | 5/5                                                        | 5/5   | 5/5     | 7          |
| Low fiber 1 day           | 6              | 6/6                                                        | 6/6   | 6/6     | 7          |
| Low fiber 2 days          | 6              | 6/6                                                        | 3/6   | 5/6     | 7          |
| High fiber 1 day          | 6              | 6/6                                                        | 6/6   | 6/6     | 7          |
| High fiber 2 days         | 6              | 6/6                                                        | 6/6   | 6/6     | 7          |
| SCFA 200 mM               | 8              | 8/8                                                        | 5/8   | 6/8     | S1         |
| Vehicle (no antibiotics)  | 4              | 4/4                                                        | 4/4   | 4/4     | S1         |
| SCFA ZT5 (no antibiotics) | 5              | 5/5                                                        | 5/5   | 5/5     | S1         |
| Vehicle with light shift  | 5              | 5/5                                                        | 5/5   | 4/5     | S2         |
| SCFA with light shift     | 9              | 7/9                                                        | 7/9   | 7/9     | S2         |

66

67

68

69

70 Table S2. ANOVA results.

| Figure No. | detail      | ANOVA            | main effect A |                   |           | main effect B |                    |           | Interaction effect |           |
|------------|-------------|------------------|---------------|-------------------|-----------|---------------|--------------------|-----------|--------------------|-----------|
|            |             |                  | factor        | F                 | P-value   | factor        | F                  | P-value   | F                  | P-value   |
| 1A         | Total SCFA  | one-way          | time          | F (5, 12) = 7.78  | p < 0.01  |               |                    |           |                    |           |
| 1B         | Acetate     | one-way          | time          | F (5, 12) = 4.59  | P < 0.05  |               |                    |           |                    |           |
| 1B         | Butyrate    | one-way          | time          | F (5, 12) = 3.75  | P < 0.05  |               |                    |           |                    |           |
| 1B         | Propionate  | one-way          | time          | F (5, 12) = 1.84  | P = 0.17  |               |                    |           |                    |           |
| 1B         | Lactate     | one-way          | time          | F (5, 12) = 1.37  | p = 0.30  |               |                    |           |                    |           |
| 1D         | pH in ICR   | two-way          | time          | F (5, 72) = 2.45  | p < 0.05  | treatment     | F (1, 72) = 218.3  | p < 0.001 | F (5, 72) = 1.219  | p = 0.282 |
| 1E         | pH in C57BL | two-way          | time          | F (5, 36) = 7.61  | p < 0.001 | treatment     | F (1, 36) = 332.9  | p < 0.001 | F (5, 36) = 7.615  | p < 0.001 |
| 2A         | Kdiney      | two-way repeated | time          | F (5, 60) = 48.12 | p < 0.001 | treatment     | F (1, 12) = 0.506  | p = 0.903 | F (5, 60) = 4.719  | p < 0.01  |
| 2A         | Liver       | two-way repeated | time          | F (5, 60) = 57.2  | p < 0.001 | treatment     | F (1, 12) = 1.371  | p = 0.264 | F (5, 60) = 0.936  | p = 0.464 |
| 2A         | Sub gla     | two-way repeated | time          | F (5, 60) = 85.66 | p < 0.001 | treatment     | F (1, 12) = 1.371  | p = 0.264 | F (5, 60) = 1.44   | p = 0.223 |
| 3C         | Kdiney      | two-way repeated | time          | F (5, 65) = 50.93 | p < 0.001 | treatment     | F (1, 13) = 1.090  | p = 0.316 | F (5, 65) = 12.46  | p < 0.001 |
| 3C         | Liver       | two-way repeated | time          | F (5, 75) = 35.55 | p < 0.001 | treatment     | F (1, 15) = 0.045  | p = 0.834 | F (5, 75) = 3.14   | p < 0.05  |
| 3C         | Sub gla     | two-way repeated | time          | F (5, 75) = 30.87 | p < 0.001 | treatment     | F (1, 15) = 1.775  | p = 0.203 | F (5, 75) = 5.31   | p < 0.001 |
| 4B         | Per1        | two-way          | time          | F (5, 71) = 45.68 | p < 0.001 | treatment     | F (1, 71) = 18.42  | p < 0.001 | F (5, 71) = 7.30   | p < 0.001 |
| 4B         | Per2        | two-way          | time          | F (5, 72) = 45.53 | p < 0.001 | treatment     | F (1, 72) = 3.05   | P = 0.08  | F (5, 72) = 5.71   | p < 0.001 |
| 4B         | Bmal1       | two-way          | time          | F (5, 71) = 50.59 | p < 0.001 | treatment     | F (1, 71) = 5.96   | p < 0.05  | F (5, 71) = 4.97   | p < 0.001 |
| 4B         | Cry1        | two-way          | time          | F (5, 72) = 63.09 | p < 0.001 | treatment     | F (1, 72) = 7.52   | p < 0.01  | F (5, 72) = 4.72   | p < 0.001 |
| 4B         | Rev-erba    | two-way          | time          | F (5, 72) = 41.87 | p < 0.001 | treatment     | F (1, 72) = 2.85   | p = 0.09  | F (5, 72) = 0.33   | P = 0.88  |
| 7D         | Kdiney      | two-way repeated | time          | F (5, 50) = 39.01 | p < 0.001 | treatment     | F (1, 10) = 1.589  | p = 0.236 | F (5, 50) = 1.01   | p = 0.421 |
| 7D         | Liver       | two-way repeated | time          | F (5, 50) = 21.13 | p < 0.001 | treatment     | F (1, 10) = 2.239  | p = 0.166 | F (5, 50) = 2.01   | p = 0.093 |
| 7D         | Sub gla     | two-way repeated | time          | F (5, 50) = 43.56 | p < 0.001 | treatment     | F (1, 10) = 0.038  | p = 0.850 | F (5, 50) = 3.17   | p < 0.05  |
| 7E         | Kdiney      | two-way repeated | time          | F (5, 50) = 89.58 | p < 0.001 | treatment     | F (1, 10) = 3.772  | p = 0.081 | F (5, 50) = 3.88   | p < 0.01  |
| 7E         | Liver       | two-way repeated | time          | F (5, 35) = 93.45 | p < 0.001 | treatment     | F (1, 7) = 2.337   | p = 0.170 | F (5, 35) = 2.82   | p < 0.05  |
| 7E         | Sub gla     | two-way repeated | time          | F (5, 45) = 30.97 | p < 0.001 | treatment     | F (1, 9) = 0.373   | p = 0.556 | F (5, 45) = 3.47   | p < 0.05  |
| S2         | Kdiney      | two-way repeated | time          | F (5, 45) = 41.62 | p < 0.001 | treatment     | F (1, 9) = 0.173   | p = 0.686 | F (5, 45) = 4.559  | p < 0.01  |
| S2         | Liver       | two-way repeated | time          | F (5, 55) = 21.23 | p < 0.001 | treatment     | F (1, 11) = -0.107 | p > 0.999 | F (5, 55) = 0.7618 | p = 0.581 |
| S2         | Sub gla     | two-way repeated | time          | F (5, 45) = 4.11  | p < 0.01  | treatment     | F (1, 9) = 2.93    | p < 0.01  | F (5, 45) = 1.181  | p = 0.333 |

71

72

73 Table S3. Cosinor analysis of RT-PCR data.

| Figure No. | Group    | Vehicle         |                 | SCFA            |                 |                   |
|------------|----------|-----------------|-----------------|-----------------|-----------------|-------------------|
|            |          | Goodness of fit | Achrophase (hr) | Goodness of fit | Achrophase (hr) | Phase change (hr) |
| 2          | Per1     | 0.03            | 10.6            | 0.1             | 9               | -1.6              |
| 2          | Per2     | 0.04            | 13.4            | 0.01            | 11.8            | -1.6              |
| 2          | Bmal1    | 0.01            | 22.6            | 0.01            | 20.6            | -2                |
| 2          | Cry1     | 0.01            | 17.4            | 0.01            | 15.8            | -1.6              |
| 2          | Rev-erba | 0.07            | 7               | 0.07            | 3               | -4                |
| S3         | Per1     | 0.065           | 11.8            | 0.05            | 12.6            | 0.8               |
| S3         | Per2     | 0.035           | 13              | 0.027           | 12.2            | -0.8              |
| S3         | Bmal1    | 0.016           | 23              | 0.019           | 23              | 0                 |
| S3         | Cry1     | 0.038           | 18.2            | 0.03            | 14.6            | -3.6              |
| S3         | Rev-erba | 0.069           | 7               | 0.064           | 7               | 0                 |

74

75

76 Table S4. Primer sequences for RT-PCR analyses.

|                 |                                |
|-----------------|--------------------------------|
| <i>Gapdh</i>    | 5'-tggtgaaggtcgggtgtaac-3'     |
|                 | 5'-aatgaagggtcgttgatgg-3'      |
| <i>Per1</i>     | 5'-caagtggcaatgagccaacg-3'     |
|                 | 5'-cgaagttgagctcccgaagtg-3'    |
| <i>Per2</i>     | 5'-tgtgtgcttacacgggtgccta-3'   |
|                 | 5'-acgttggttgcgcatgaa-3'       |
| <i>Bmal1</i>    | 5'-ccacctcagagccattgataca-3'   |
|                 | 5'-gagcaggttagttccactttgtct-3' |
| <i>Cry1</i>     | 5'-atccgctgcgtctatcctc-3'      |
|                 | 5'-cccgaatcacaacagacg-3'       |
| <i>Rev-erba</i> | 5'-cttcgtagcctttctcagc-3'      |
|                 | 5'-cagctcctcctcgtaagtg-3'      |

77

78

79 Table S5. Nutrient concentrations of MF diets

|                               | MF (100g) |
|-------------------------------|-----------|
| Moisture                      | 7.9 g     |
| Crude protein                 | 23.1 g    |
| Crude fat                     | 5.1 g     |
| Crude ash                     | 5.8 g     |
| Crude fibre                   | 2.8 g     |
| soluble nitrogen free extract | 55.3 g    |
| Calorie                       | 359 kcal  |

80

81
